# Supplementary material for: Breastfeeding Communication Strategies, Challenges and Opportunities in the Twitter-Verse: Perspectives of Influencers and Social Network Analysis
Source: Int J Environ Res Public Health. 2021 Jun 8;18(12):6181. doi: 10.3390/ijerph18126181 (PMC8230232; doi:10.3390/ijerph18126181)
Supplement: Supplementary file 1 [file ijerph-18-06181-s001.zip › ijerph-1237499-supplementary.pdf]

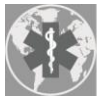

**Figure S1.** The 10 essential public health services (retrieved from <https://www.cdc.gov/publichealthgateway/publichealthservices/essentialhealthservices.html>)

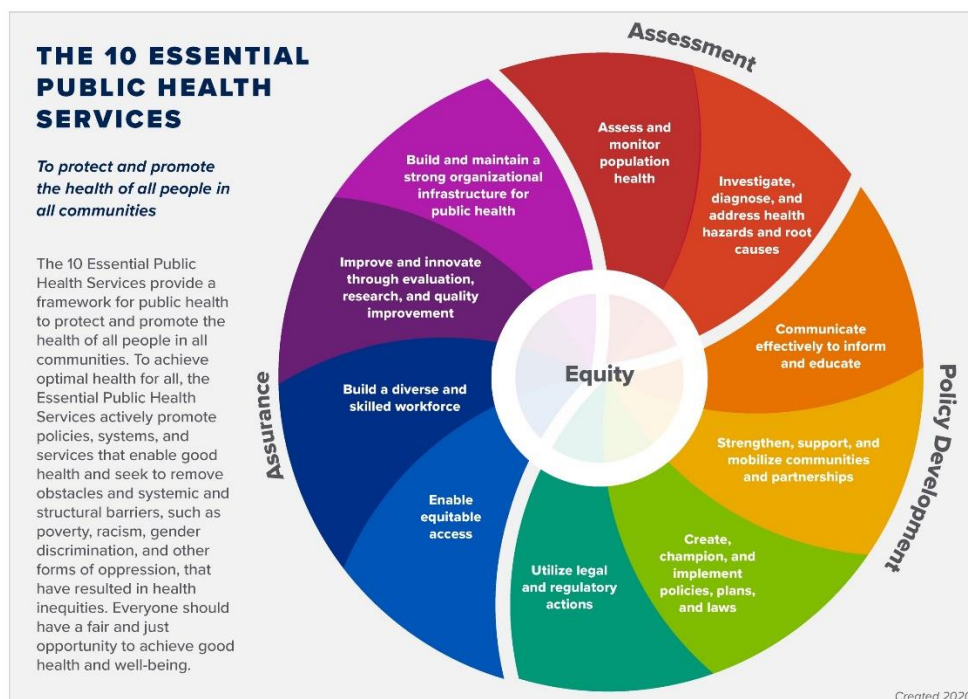

**Table S1. Codebook to describe influencer types**

| Code | Child code | Summary title                                     | Details                                                                                                                                                                                                                                                              |
|------|------------|---------------------------------------------------|----------------------------------------------------------------------------------------------------------------------------------------------------------------------------------------------------------------------------------------------------------------------|
| 1    |            | <b>Scientific health community</b>                |                                                                                                                                                                                                                                                                      |
|      | a          | researcher without clinical duties                | User with a verified research-focused position, such as research professor or postdoctoral fellow <b>without</b> any clinical appointments.                                                                                                                          |
|      | b          | clinician                                         | User with verified clinical appointment related to breastfeeding or maternal/infant health such as pediatrician, gynecologist, lactation consultant, and nurse.                                                                                                      |
|      | ab         | researcher with clinical duties                   | User with a verified research-focused position such as research professor or postdoctoral fellow <b>with</b> a clinical appointment.                                                                                                                                 |
|      | c          | public health employee                            | User who works in the public health sector, such as a public health communication officer or public health community educator                                                                                                                                        |
|      | d          | university                                        | User is managing the account of a university, university department, or institute, including medical schools                                                                                                                                                         |
|      | e          | hospital or clinic                                | User is managing the account of a hospital, hospital department, clinic, or pharmacy                                                                                                                                                                                 |
|      | f          | health-related governmental agency                | User is managing the account of a health-related <b>governmental</b> agency, programs or initiatives, at the national, regional, or local levels, e.g., CDC                                                                                                          |
|      | g          | professional association                          | User is managing the account of a health-related professional association, which represents the interest of professional practitioners and maintains oversight of the profession's legitimate practice, e.g., through providing training and organizing conferences. |
|      | h          | academic journals or conferences                  | User is managing the account of an academic journal, conference, or broadcasting station focused on health news                                                                                                                                                      |
|      | i          | health-related NGO                                | User is managing the account of a health-related <b>non-governmental</b> agency, including professional coalitions, e.g., WHO, California Breastfeeding Coalition                                                                                                    |
|      | j          | others                                            | All other users from the scientific health community                                                                                                                                                                                                                 |
| 2    |            | <b>General community</b>                          |                                                                                                                                                                                                                                                                      |
|      | o          | individual from the general public                | Layperson who is <b>not</b> from the scientific health community and who does not fit any other category below                                                                                                                                                       |
|      | p          | non-governmental non-health-focused celebrities   | User whom we assumed may be popular such as Hollywood actors                                                                                                                                                                                                         |
|      | q          | non-health related news                           | User is managing the account of a broadcasting station or podcast or other media outlet <b>not</b> focused on health news                                                                                                                                            |
|      | r          | non-health related governmental agency & programs | User is managing the account of a non- health related <b>governmental</b> agency, programs or initiatives, at the national, regional, or local levels, e.g., UK Department of Education                                                                              |
|      | s          | elected government official                       | User with a verified non-health focused elected position in local, regional, or nation-wide government                                                                                                                                                               |

---

|   |   |                                     |                                                                                                                                                                                                        |
|---|---|-------------------------------------|--------------------------------------------------------------------------------------------------------------------------------------------------------------------------------------------------------|
|   | t | non-health related NGO              | User is managing the account of a non-health related <b>non-governmental agency</b> , e.g., Glasgow Life Organization                                                                                  |
|   | u | other                               | All other users from the general community                                                                                                                                                             |
| 3 |   | <b>Companies</b>                    |                                                                                                                                                                                                        |
|   | x | selling merchandise unrelated to BF | User is managing the account of a commercial company that sells merchandise not directly related to breastfeeding, such as baby clothes, jewelry, illustrations, and art posters of mothers and babies |
|   | z | selling merchandise related to BF   | User is managing the account of a commercial company that sells breastfeeding-related merchandise such as breast pumps, bras, books, and recipes as galactagogues                                      |

\*Code and child code numbers/letters are chosen randomly to help organize the data and do not have any mathematical meaning. NGO, non-governmental organization. BF, breastfeeding.

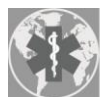

**Table S2.** Codebook to describe tweet content related to breastfeeding

| Code* | Summary title                                 | Description                                                                                                                                                                                                                                                                                                                                                                                           | Example of tweet*                                                                                                                                                       |
|-------|-----------------------------------------------|-------------------------------------------------------------------------------------------------------------------------------------------------------------------------------------------------------------------------------------------------------------------------------------------------------------------------------------------------------------------------------------------------------|-------------------------------------------------------------------------------------------------------------------------------------------------------------------------|
| 11    | Research findings                             | Peer-reviewed research findings shared in the form of statements, links to research papers blogs, or pictures of Powerpoint slides from conferences                                                                                                                                                                                                                                                   | Published Today in @journal: The longer women #breastfeed, the more they are protected against #breastcancer.                                                           |
| 12    | Public health & clinical guidelines           | Public health or clinical guidelines, recommendations, or policy briefs endorsed by academic or health organizations (governmental or non-governmental)                                                                                                                                                                                                                                               | The #WHO recommends infant be exclusively #Breastfed for the first six months of life #nutrition #humanmilk #breastfeeding @UniversityName                              |
| 13    | Academic or clinical conferences/other events | Invites or academic updates related to: <ul style="list-style-type: none"><li>• research talks, symposia, conferences, and workshops, or</li><li>• clinical training events, or</li><li>• grant or employment opportunities</li></ul>                                                                                                                                                                 | Mark your #Calendar for June 9. Join us the #nameOfConference. Focus on #lipids in #breastmilk @cityname @university. Register HERE. [link to conference page provided] |
| 21    | General opinions                              | Opinions about the field of breastfeeding research or the current state of breastfeeding promotion, protection, and support                                                                                                                                                                                                                                                                           | Why does #NameOfNewsStation say breastfeeding is not harmful during #pandemic? So bad for #breastfeeding cause. should say it's essential.                              |
| 22    | Announcements for community engagement        | Invites for parents to: <ul style="list-style-type: none"><li>• join support groups or awareness sessions</li><li>• call hotline</li><li>• schedule appointment at clinic</li><li>• participate in studies recruitments or awareness campaigns as well</li></ul> Thank you notes exchanges between parents and stakeholders (e.g., lactation consultant, pediatrician, research, health organization) | Do you know that the @HotlineName offers #breastfeedingsupport in #TownName? Call 0000000000 [link to website provided]                                                 |
| 23    | Advocacy tweets                               | Tweets that celebrate or advocate breastfeeding protection, promotion, and support, such as advocating for public breastfeeding, maternity leave-supportive laws/policies/resolutions, establishing pumping rooms, or standing against breastfeeding sexualization.                                                                                                                                   | Reach out to your #Congress members. Push them to support this #nameOfBill that helps #breastfeeding families with better #paid #maternity leave.                       |
| 24    | Personal stories and experiences              | Personal stories and experiences related to breastfeeding                                                                                                                                                                                                                                                                                                                                             | That moment when you are #breastfeeding at 2 am and all you want is a big bowl of #strawberries! [includes selfie of mother and baby]                                   |

---

|    |                                                     |                                                                                                                                                                                                                    |                                                                                                                                                                       |
|----|-----------------------------------------------------|--------------------------------------------------------------------------------------------------------------------------------------------------------------------------------------------------------------------|-----------------------------------------------------------------------------------------------------------------------------------------------------------------------|
| 25 | Tweets to support milk banks                        | Tweets that encourage others to donate milk or funds to a milk bank                                                                                                                                                | Every #breastmilk drop matters. We are accepting @milkbankname today and help us save #preterm babies.                                                                |
| 26 | Peer-to-peer support                                | Tweets that provide or ask for advice, recommendations, tips, or resources related to how to support parents in their breastfeeding journey. These tweets address fellow clinicians such as lactation consultants. | Any tips on how to conduct a successful #Zoom call with #breastfeeding mothers? Never done this before. Want mom to feel #safe and #comfortable. #IBCLC @HospitalName |
| 31 | Tweets to sell merchandise related to breastfeeding | Advertisement for purchasing breastfeeding-related merchandise such as breast pumps, bras, books, and recipes as galactagogues                                                                                     | So easy to #breastfeed with the new #nameOfBreastPump edition! Makes a perfect #gift for #babyshower. [link to store included]                                        |
| 32 | Tweets to sell general merchandise                  | Ad for purchasing merchandise not directly related to breastfeeding such as baby clothes, jewelry, illustrations, and art posters of mothers and babies                                                            | Available now! Our new collection of #baby clothes for Spring 2020 is out. Check out the cutest outfits for your #breastfeeding baby here [link to store included]    |

\*Code numbers are chosen randomly to help organize the data and do not have any mathematical meaning. ^ Tweets are not real but inspired by actual tweets to ensure influencers remain anonymous because copy/pasting a tweet into the Twitter “search box” will likely identify the tweet itself and its sender. We excluded tweets that used breastfeeding hashtags for pornographic purposes or for irrelevant purposes, such as tweeting about one’s breastfeeding cat.

**Table S3. Sample interview questions**

|                                                                                                                                                                              |
|------------------------------------------------------------------------------------------------------------------------------------------------------------------------------|
| 1) What are the reasons you tweet around breastfeeding? What goals do you want to achieve by engaging in Twitter discussions related to breastfeeding?                       |
| 2) What topics do you tweet about?                                                                                                                                           |
| 3) How do you decide what to tweet, retweet and what to comment on?                                                                                                          |
| 4) What drives your decision not to tweet, retweet, or comment about certain topics related to breastfeeding?                                                                |
| 5) How do you decide whom to follow on Twitter?                                                                                                                              |
| 6) Do you know who your audience is? Who is it comprised of? Who is your target audience?                                                                                    |
| 7) What do you think resonates most with your followers in terms of tweet content, language and tone?                                                                        |
| 8) What strategies do you use on Twitter that you believe are helping you reach your target audience?                                                                        |
| 9) What challenges do you personally face when communicating on Twitter?                                                                                                     |
| 10) From a technical standpoint, is there anything you would like to learn (e.g., how Twitter works, different tools ) that might help you achieve your communication goals? |

**Table S4. Descriptive statistics of influencer Twitter accounts**

|                       | Median  | IQR       | Range             |
|-----------------------|---------|-----------|-------------------|
| Status count          | 39,757  | 128,106   | 512 to 421,393    |
| Followers count       | 138,698 | 1,063,525 | 234 to 19,398,870 |
| Favorites count       | 3002    | 12,006    | 0 to 43,178       |
| Friends count         | 814     | 1605      | 46 to 13,513      |
| Age of account, years | 11      | 3         | 2 to 14           |

\*More than 75% of influencers were from North America or Europe. IQR, interquartile range.  $n=813$ .

**Table S5. Differences in tweet content sent across the three influencer groups**

| Tweet category*                     | Scientific community<br>(n=798 tweets) | General community<br>(n=233 tweets) | Companies<br>(n=20) |
|-------------------------------------|----------------------------------------|-------------------------------------|---------------------|
| Research findings                   | 70 (8.77)                              | 28 (12.0)                           | 2 (10)              |
| Public health & clinical guidelines | 168 (23.1)                             | 29 (12.4)                           | 6 (30)              |
| Academic & clinical conferences     | 93 (12.8)                              | 10 (4.29)                           | 0                   |
| General opinions                    | 43 (5.91)                              | 71 (30.5)                           | 0                   |
| Community engagement                | 126 (17.3)                             | 20 (8.58)                           | 1 (5)               |
| Advocacy tweets                     | 76 (10.4)                              | 39 (16.7)                           | 2 (10)              |
| Personal stories & experiences      | 12 (1.65)                              | 27 (11.6)                           | 1 (5)               |
| Tweets to support milk banking      | 6 (0.82)                               | 3 (1.29)                            | 0                   |
| Peer-to-Peer support                | 11 (1.51)                              | 1 (0.43)                            | 0                   |
| Tweets to sell BF merchandise       | 91 (12.5)*                             | 5 (2.15)                            | 6 (30)              |
| Tweets to sell general merchandise  | 102 (14.0)                             | 0                                   | 2 (10)              |

\*Tweet category differences across the three influencer groups are statistically significant ( $P<.001$ ; Chi-squared test).

Values are n (%) where % the percentage of tweets within one influencer category. For example, 70 tweets were sent by the scientific community influencers related to research findings, which represents 8.77% of all tweets sent by influencers from the scientific community. \* The 12.5% of tweets to sell general merchandise by the scientific health community may be misleading, as these tweets were all sent by one user only.

**Figure S2. Differences in influencer groups across the different tweet categories**

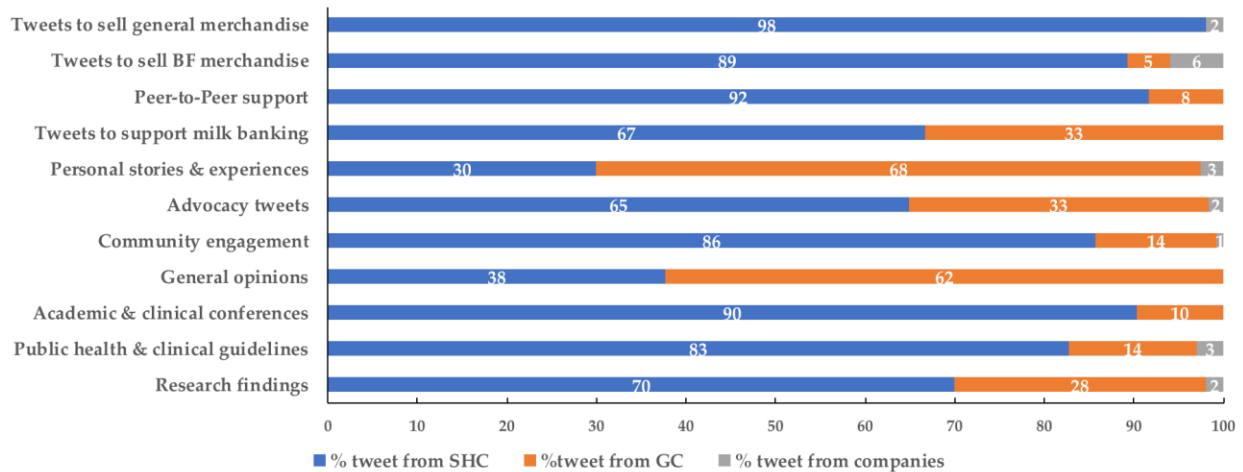

SHC, scientific health community influencers. GC, general community influencers. Unlike Table S5 that shows percentage of each tweet category by influencer type, Figure S2 shows the distribution of influencers by tweet type. For example, 70% of tweets about research findings were sent by the SC compared to 28% by the general community.

**Table S6. Basic description of interviewed influencers**

| Number of interviewees | Description of Influencer*                                                                                             | Geographical Area        |
|------------------------|------------------------------------------------------------------------------------------------------------------------|--------------------------|
| 1                      | Academic epidemiology researcher                                                                                       | North America            |
| 1                      | Academic biomedical researcher                                                                                         | Europe                   |
| 1                      | Academic clinical researcher and nurse                                                                                 | North America            |
| 1                      | Academic translational researcher and pharmacist                                                                       | Australasia <sup>1</sup> |
| 1                      | Academic clinical researcher and gynecologist                                                                          | Europe                   |
| 1                      | Lactation consultant and journal publisher                                                                             | Australasia              |
| 1                      | Academic clinical researcher, lactation consultant, and book editor                                                    | North America            |
| 3                      | Lactation consultant                                                                                                   | Europe                   |
| 1                      | Lactation consultant and director of state-wide breastfeeding coalition                                                | North America            |
| 2                      | Public health professional with communication or directorship roles at an <i>international non-governmental agency</i> | Asia or North America    |
| 2                      | State-wide breastfeeding coalition                                                                                     | North America            |
| 1                      | Health-related <i>federal governmental agency</i>                                                                      | North America            |
| 1                      | Health-related <i>nationwide non-governmental agency</i> <sup>^</sup>                                                  | North America            |
| 1                      | Health-related <i>nationwide non-governmental agency</i> <sup>^</sup>                                                  | Europe                   |

---

|   |                                                             |                                                   |
|---|-------------------------------------------------------------|---------------------------------------------------|
| 1 | Health-related <i>international non-governmental</i> agency | International; account managed from North America |
| 1 | Journalist who covers African Women's issues                | Africa                                            |

\* 2 (20%) of interviewed influencers were male. ^ account managed by volunteer. <sup>1</sup> Australasia covers Australia, New Zealand and a few neighboring islands.
